# Supplementary material for: Comprehensive Chemical Characterization of Chia (Salvia hispanica L.) Seed Oil with a Focus on Minor Lipid Components
Source: MDPI journal article supplement (doi:10.3390/foods12010023), 2022-12-21
Supplement: s1 [file s1]

## Supplementary Materials

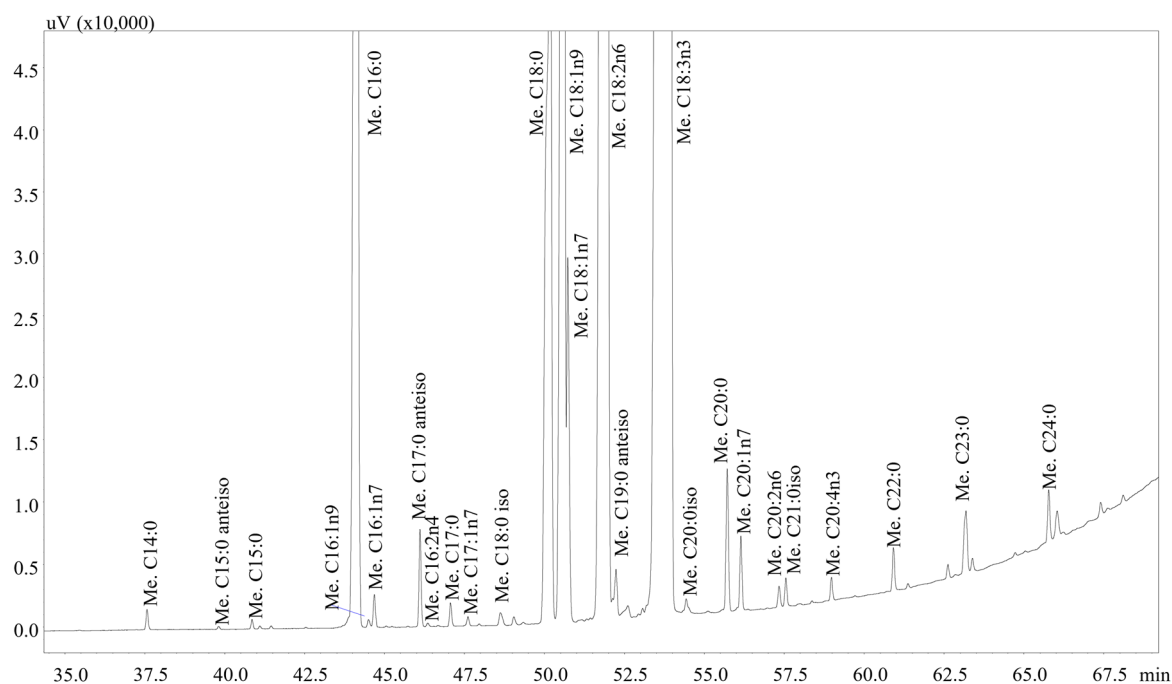

**Figure S1:** GC-FID chromatogram relative to the esterified FA composition of chia seed oil.

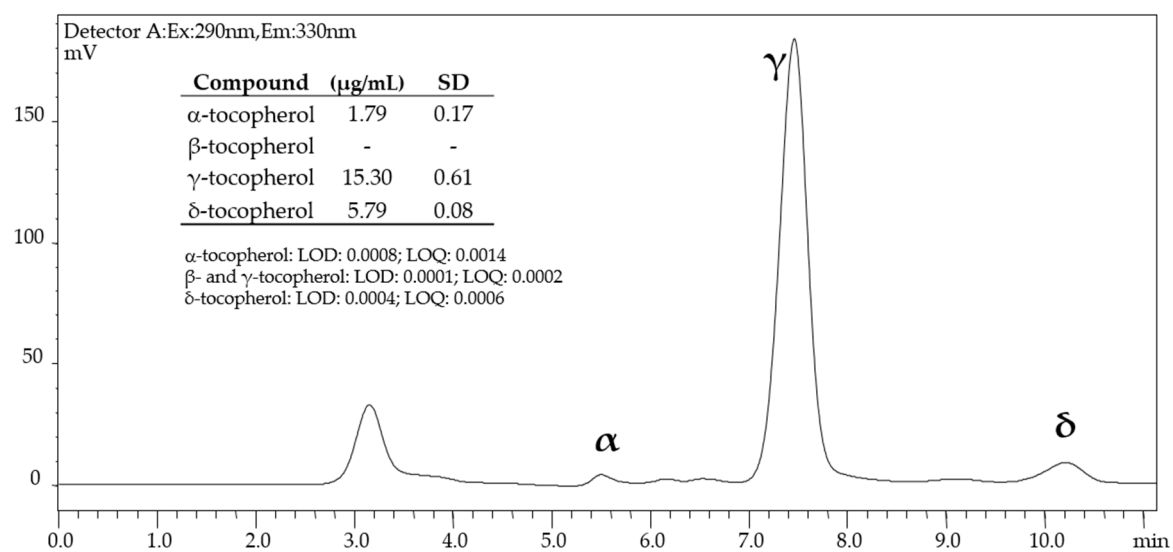

**Figure S2:** HPLC chromatogram of tocopherols in chia seed oil. The table in the insert report the quantitative results (mg/mL) along with the standard deviation (SD) of three replicates.

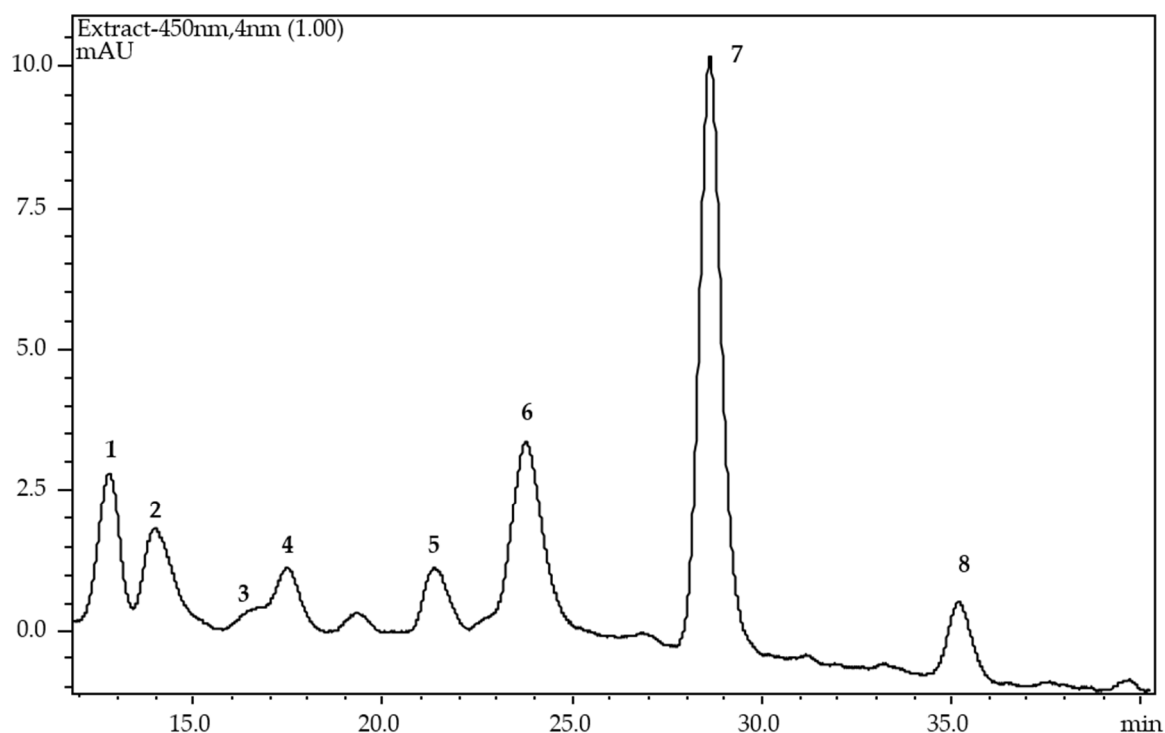

**Figure S3:** HPLC-PDA chromatogram, extracted at 450 nm, of xanthophylls in chia seed oil. Peak numbering: 1, Neochrome; 2, Luteoxanthin; 3, Auroxanthin; 4, Antheraxanthin; 5, Mutatoxanthin; 6, Lutein; 7, all E-Zeaxanthin; 8, 9,9'-Z-Zeaxanthin.

**Table S1.** List of identified phenolic compounds in Chia seed oil, along with retention time (RT), molecule-related ion ( $[M-H]^-$ ) and chemical class.

| RT    | $[M-H]^-$ | Compounds                     | Chemical Classes                                      |
|-------|-----------|-------------------------------|-------------------------------------------------------|
| 10.93 | 153.1     | Protocatechuic acid           | Phenolic acid (benzoic acid derivative)               |
| 11.55 | 289.3     | Catechin/Epicatechin          | Flavanol                                              |
| 20.72 | 431.2     | Genistin                      | Isoflavone glucoside                                  |
| 22.13 | 311.3     | Caftaric acid                 | Phenolic acid (hydroxycinnamic acid derivative)       |
|       |           | Protocatechuic acid glucoside | Phenolic acid derivative (phenolic glucoside)         |
| 24.71 | 315.3     |                               |                                                       |
| 25.85 | 359.2     | Rosmarinic acid               | Phenolic acid (hydroxycinnamic acid derivative)       |
| 29.35 | 317.5     | Myricetin                     | Flavonol                                              |
| 32.31 | 315.3     | Methylquercetin isomer I      | Flavonol                                              |
| 32.83 | 315.3     | Methylquercetin isomer II     | Flavonol                                              |
|       |           |                               | Phenolic acid dimer (hydroxycinnamic acid derivative) |
| 33.2  | 293.3     | Dehydrodiferulic acid         |                                                       |
| 34.65 | 387.3     | Medioresinol                  | Lignan                                                |
|       |           |                               | Phenolic acid derivative (hydroxycinnamic acid ester) |
| 35.26 | 397.4     | Sinapoylquinic acid           |                                                       |

**Table S2.** List of identified xanthophylls along with UV-VIS and MS spectral data (molecule-related ion and fragments in positive ion mode)

| N. | Carotenoid               | $\lambda_{\max}$ UV-Vis (nm) | [M+H] <sup>+</sup> | Fragments           |
|----|--------------------------|------------------------------|--------------------|---------------------|
| 1  | Neochrome                | 400, 422, 450                | 601.5              | 583.4, 565.6        |
| 2  | Luteoxanthin             | 399, 423, 449                | 601.5              | 583.4, 565.6        |
| 3  | Auroxanthin              | 382, 402, 427                | 601.5              | 583.4, 565.6        |
| 4  | Antheraxanthin           | 421, 441, 473                | 585.4              | 567.3, 549.5        |
| 5  | Mutatoxanthin            | 405, 428, 453                | 585.4              | 567.3, 549.5        |
| 6  | Lutein                   | 422, 446, 472                | 569.6              | 551.5, 533.3, 476.4 |
| 7  | all <i>E</i> -Zeaxanthin | 426, 452, 478                | 569.6              | 551.5, 533.3, 476.4 |
| 8  | 9,9'-Z-Zeaxanthin        | 338, 419, 446, 473           | 569.6              | 551.5, 533.3, 476.4 |
